1 **Two accessory proteins govern MmpL3 mycolic acid transport in mycobacteria**

2

3

4

5

6 **Allison Fay<sup>1</sup>, Nadine Czudnochowski<sup>4,5</sup>, Jeremy Rock<sup>7</sup>, Jeffrey R. Johnson<sup>8,9,10</sup>,**

7 **Nevan J. Krogan<sup>8,9,10</sup>, Oren Rosenberg<sup>4,5,6</sup>, Michael S. Glickman<sup>1,2,3,\*</sup>**

8

9

10 <sup>1</sup> Immunology Program, Sloan Kettering Institute

11 <sup>2</sup> Division of Infectious Diseases, Memorial Sloan Kettering Cancer Center

12 <sup>3</sup> Immunology and Microbial Pathogenesis Graduate Program, Weill Cornell Graduate  
13 School.

14 <sup>4</sup> Program for Microbial Pathogenesis

15 <sup>5</sup> Division of Infectious Diseases, Department of Medicine, University of California, San  
16 Francisco

17 <sup>6</sup> Chan-Zuckerberg Biohub

18 <sup>7</sup> Laboratory of Host-Pathogen Biology, The Rockefeller University

19 <sup>8</sup> Department of Cellular and Molecular Pharmacology, University of California San  
20 Francisco, San Francisco, CA, USA;

21 <sup>9</sup> Quantitative Biosciences Institute (QBI), University of California San Francisco, San  
22 Francisco, CA, USA;

23 <sup>10</sup> The J. David Gladstone Institutes, San Francisco, CA, USA.

24

25 \*Correspondence to:

26 Michael S. Glickman MD

27 Immunology Program, Sloan Kettering Institute

28 1275 York Ave

29 New York, NY 10065

30 6468882368

31 glickmam@mskcc.org

32 **Abstract**

33

34 Mycolic acids are the signature lipid of mycobacteria and constitute an important  
35 physical component of the cell wall, a target of mycobacterial specific antibiotics, and a  
36 mediator of *M. tuberculosis* pathogenesis. Mycolic acids are synthesized in the  
37 cytoplasm and are thought to be transported to the cell wall as a trehalose ester by the  
38 MmpL3 transporter, an antibiotic target for *M. tuberculosis*. However, the mechanism by  
39 which mycolate synthesis is coupled to transport, and the full MmpL3 transport  
40 machinery, is unknown. Here we identify two new components of the MmpL3 transport  
41 machinery in mycobacteria. The protein encoded by *MSMEG\_0736/Rv0383c* is  
42 essential for growth of *M. smegmatis* and *M. tuberculosis*, is anchored to the  
43 cytoplasmic membrane, physically interacts with and colocalizes with MmpL3 in growing  
44 cells, and is required for trehalose monomycolate transport to the cell wall. In light of  
45 these findings we propose Msmeg\_0736/Rv0383c be named “TMM transport factor A”,  
46 TtfA. The protein encoded by *MSMEG\_5308* also interacts with the MmpL3 complex,  
47 but is nonessential for growth or TMM transport. However, *MSMEG\_5308* accumulates  
48 with inhibition of MmpL3 mediated TMM transport and stabilizes the MmpL3/TtfA  
49 complex, indicating that it stabilizes the transport system during stress. These studies  
50 identify two new components of the mycobacterial mycolate transport machinery, an  
51 emerging antibiotic target in *M. tuberculosis*.

52

53

## 54 **Introduction**

55 Mycobacteria have a complex cell wall, which is crucial for maintaining cell integrity,  
56 protects against environmental stress, provides a barrier against access of potentially  
57 harmful molecules into the cell, and plays a critical role in mycobacterial pathogenesis.  
58 The cell wall of mycobacteria is comprised of the common bacterial cell wall  
59 glycopolymer, peptidoglycan, external to the cytoplasmic membrane, as well as an  
60 additional covalently attached glycopolymer layer comprised of arabinogalactan.  
61 Arabinogalactan bridges peptidoglycan and mycolic acids, the signature long chain lipid  
62 of mycobacteria. Arabinogalactan esterified mycolates constitute the inner leaflet of the  
63 outer membrane bilayer, with the outer leaflet being comprised of hydrophobically  
64 associated complex lipids including trehalose dimycolate, sulfolipids, lipomannan and  
65 lipoarabinomannan. This outer membrane increases both the complexity of the cell wall  
66 structure and its hydrophobicity. The enzymatic steps of the arabinogalactan and  
67 mycolate precursor biosynthesis have been well described and are the targets of  
68 several antimycobacterials, including isoniazid and ethambutol [1-3].

69 Mycolic acid synthesis begins with FASI system that produces C16-C18 and  
70 C24-C26 fatty acids. The FASII system then extends these products to produce the long  
71 meromycolate chains that are the substrates for the polyketide synthetase, Pks13.  
72 Pks13 catalyzes the final condensation step to produce  $\alpha$ -alkyl  $\beta$ -ketoacids (C60-C90)  
73 which are then acetylated and transferred to the 6 position of trehalose [4,5]. Mono- $\alpha$ -  
74 alkyl  $\beta$ -ketoacyl trehalose is then reduced by CmrA to trehalose monomycolate (TMM)  
75 presumably in the inner leaflet of the cytoplasmic membrane [6,7]. TMM can then be  
76 modified by non-essential mycolic acid methyltransferases to produce cyclopropane

77 rings and methyl branches, and in the case of *M. tuberculosis* these modifications alter  
78 host-mycolic acid responses [8-14].

79 After synthesis, TMM must be transported across the cytoplasmic membrane to  
80 reach the cell wall; this step is known to require the MmpL3 transporter [7,15-17]. The  
81 MmpLs [**M**ycobacterial **m**embrane **p**rotein, **L**arge) are multi-substrate transporters of the  
82 Resistance-Nodulation-Division (RND) class that usually act as homotrimers and are  
83 exporters of molecules from the outer leaflet of the plasma membrane, to, or through  
84 the outer membrane. In *Mtb* they include lipid and fatty acid transporters of virulence-  
85 associated lipids across the cell envelope. Transport is driven by downhill movement of  
86 H<sup>+</sup> in response to the electrochemical H<sup>+</sup> gradient ( $\Delta\tilde{\mu}_{H^+}$ ) across the plasma membrane.  
87 MmpL3 is the only MmpL protein that is essential *in vitro*, though mutations in several  
88 other MmpLs severely compromise virulence in infection models [7,15-18]. Mutational  
89 analyses and ‘transposon-site-hybridization’ (TraSH) revealed MmpL3 is essential for  
90 *Mtb* viability *in vitro* [19] and *in vivo* [20], and several inhibitors of MmpL3 are already in  
91 clinical development, among them are a set of diamine-indole-carboxamides [21-23]  
92 including Novartis NITD-304, and the pyrrole BM212 [24].

93 Genetic, pharmacologic, and biochemical studies strongly indicate that the MmpL3  
94 transporter is the TMM flippase. MmpL3 has been shown to have flippase activity in  
95 spheroplast assays [25] and genetic depletion leads to growth arrest and loss of TMM  
96 transport [26,27]. Recent crystal structures of MmpL3 suggest potential mechanisms of  
97 TMM transport [28]. However, the full mechanisms linking TMM biosynthesis to MmpL3  
98 transport, and the full set of cofactors used by MmpL3 to transport TMM, are unknown.



99 MmpLs share close homology with other bacterial RND proteins, typified by the  
100 acridine resistance complex (AcrB) transporter that is involved in the efflux of  
101 hydrophobic small molecules from or through the periplasm of *E. coli*. Like AcrB, the  
102 MmpLs are thought to be localized to the inner membrane [29]. However AcrB does not  
103 act alone: it additionally forms the core of a comprehensive secretion system that  
104 traverses both the inner and outer membrane of the cell envelope in Gram negative  
105 bacteria, allowing the AcrB substrates to bypass the periplasm [30]. To form this  
106 membrane spanning system, AcrB interacts with a periplasmic coupling protein called  
107 AcrA (or more generally, the Membrane Fusion Protein (MPF)), which in turn links to an  
108 outer membrane channel called TolC (or more generally, the Outer Membrane Protein  
109 (OMP)) [31-33] The mechanism of bacterial RND transporters is thought to be highly  
110 conserved and involves the engagement of the Proton Motive Force ( $\Delta\tilde{\mu}_{H^+}$ ) to drive  
111 drugs, ions and other small molecules from the periplasm across the outer membrane  
112 through the MPF, thus preventing the entrance of toxic substances into the bacterial  
113 cytoplasm[34-36]. We thus have hypothesized that MmpL3 acts in concert with other  
114 mycobacterial proteins, but no MmpL3 associated proteins have been identified. Here  
115 we describe two previously unknown cofactors for MmpL3, one of which is required for  
116 TMM transport, and one of which is stress inducible and stabilizes the MmpL3 complex.

117

118

119

120

121 **Results**

122 **MmpL3 is stably associated with two proteins of unknown function, MSMEG\_0736**  
123 **and MSMEG\_5308**

124 In order to discover stable binding interactions with MsMmpL3 *in situ*, we devised  
125 a native, stringent, affinity purification. MsMmpL3 was fused to a flexible linker  
126 connecting the C-terminus of MmpL3 to monomeric superfolder GFP (msfGFP) at the  
127 native chromosomal locus of MmpL3. As *mmpL3* is an essential gene, the normal  
128 growth rate of this strain suggests that fusion did not disrupt the essential function of the  
129 protein. Cell membranes were collected and solubilized with the mild detergent n-  
130 Dodecyl  $\beta$ -D-maltoside (DDM). Anti-GFP nanobodies covalently linked to a magnetic  
131 bead were incubated with detergent-solubilized membranes and then extensively  
132 washed with 0.2% DDM containing buffer. Co-purifying proteins were identified via  
133 shotgun mass spectrometry (Fig 1). One of the most abundantly co-purifying proteins  
134 was a protein of unknown function, MSMEG\_0736 (Table 1 and Table S1A,B). In  
135 contrast, pulldown of MmpL10, another MmpL transporter, did not copurify  
136 MSmeg\_0736 or any proteins in common with MmpL3 (Table S1A,B). To validate this  
137 interaction, we created a strain in which a msfGFP was fused to MSMEG\_0736. When  
138 MSMEG\_0736-msfGFP was purified from detergent solubilized membranes under the  
139 same conditions, the most abundantly copurified protein was MsMmpL3 (Table 1 and  
140 Table S1A,B). In a control experiment using MSMEG\_0410 (MmpL10) fused to msfGFP  
141 as a bait, neither MSMEG\_0736, MSMEG\_0250 or MSMEG\_5308 were co-purified  
142 (Table 1 and Table S1A,B). In a biological replicate of the MSmeg\_0736 pulldown, we  
143 confirmed the identity of the prominent band at approximately 100 kDa as MmpL3 (Fig

144 1B, Table S2). As MSMEG\_0736 interacts with MmpL3, and evidence we will present in  
145 this paper shows MSMEG\_0736 is required for TMM transport, we propose  
146 MSMEG\_0736 be named “TMM transport factor A”, TtfA.

147 Analysis of MsTtfA and MsMmpL3 copurifying proteins identified by anti-GFP  
148 nanobody purification showed a third complex member found in both pulldowns, the  
149 protein encoded by *MSMEG\_5308*. This seven bladed beta-propeller protein has a  
150 homolog in *M. tuberculosis*, Rv1057, that has been shown to be non-essential, although  
151 Mtb lacking Rv1057 fails to properly secrete ESAT-6 and replicated poorly in  
152 macrophages [37]. The Rv1057 gene has been shown to be under control of two two-  
153 component systems involved in sensing cell stress, MprAB and TcrRS, as well as the  
154 envelope stress responsive sigma factor SigE [38-40]. Rv1057 was also reported to be  
155 the most transcriptionally induced gene in response to MmpL3 depletion [41],  
156 suggesting a connection to MmpL3 function.

### 157 **TtfA is essential for growth of *M. smegmatis* and *M. tuberculosis in vitro***

158 The *M. tuberculosis* H37Rv homolog of TtfA is Rv0383c. *rv0383c* was predicted  
159 to be an essential gene in H37Rv based on transposon mutagenesis [19,42], but its  
160 essentiality in *M. smegmatis* and *M. tuberculosis* is unknown and its molecular function  
161 obscure. With no predicted protein domains or homologs of known function,  
162 confirmation of its essentiality in both organisms was the first step to analyze its  
163 function. To test the essentiality of *ttfA* in *M. smegmatis*, we generated a merodiploid  
164 strain in which a second copy of *ttfA* was integrated in the chromosome. We then  
165 deleted the endogenous coding sequence, so that the only a single copy of *ttfA*  
166 remained at the *attB* site. We then attempted to remove the second copy of *ttfA*

167 from *attB* by marker exchange with either a vector or a plasmid encoding TtfA and  
168 conferring kanamycin resistance, pAJF792 [43]. Only transformation with the plasmid  
169 encoding TtfA yielded transformants that were kanamycin resistant and streptomycin  
170 sensitive. Similar results were obtained with a plasmid encoding TtfA from *M.*  
171 *tuberculosis* (Fig 2A). This inability to remove *ttfA* from *attB* in our  $\Delta ttfA$  strain suggested  
172 that *ttfA* was required for growth of *M. smegmatis* (Fig 2A). To further assess the  
173 essential role of MsTtfA, we generated CRISPR interference (CRISPRi) strain that  
174 allows anhydrotetracycline (ATc) inducible knockdown [44]. Growth inhibition by gene  
175 knockdown was visualized by spotting 10-fold serial dilutions on plates with and without  
176 ATc, MsTtfA depletion led to an ATc dependent growth defect not seen in the non-  
177 targeting control (Fig 2A). Gene knockdown of *ttfA* in *M. smegmatis* also led to  
178 cessation of growth in liquid media between 9 and 12 hours post induction with ATc (Fig  
179 2B). To test whether TtfA was essential in *M. tuberculosis*, we attempted to knockout  
180 the gene using a temperature sensitive phage and were unsuccessful, suggesting  
181 essentiality. We then generated three *ttfA* targeting CRISPRi strains with independent  
182 guide RNAs. Gene knockdown of *ttfA* in *M. tuberculosis* with all three guide RNAs all led  
183 to cessation of growth in liquid media after three days after induction with ATc,  
184 indicating that TtfA is essential for *M. tuberculosis* growth *in vitro* (Fig 2C).

185 To examine the morphologic changes that accompany growth arrest during loss  
186 of MsTtfA, we depleted the protein using CRISPRi and tracked morphological changes  
187 using a MalF(1,2)-mCitrine expression strain that uniformly labels the cell membrane.  
188 Time-lapse microscopy indicated that growth arrest without MsTtfA was characterized  
189 by shorter, misshapen cells (Fig 2D, Movies S1, S2). Quantitation of cell length

190 revealed that MsTtfA depleted cells were significantly shorter ( $2.88 \pm 0.89 \mu\text{m}$ ) as  
191 compared to control cells ( $6.00 \pm 2.03 \mu\text{m}$ ) (Fig 2E). The short cell phenotype suggested  
192 that MsTtfA might be required for cell elongation. These data indicate that TtfA is  
193 essential for mycobacterial viability and that the function of this gene is conserved  
194 between fast and slow growing mycobacteria.

### 195 **MSMEG\_0736 localizes to poles and septa**

196 The predicted protein encoded by MsTtfA contains a predicted N-terminal  
197 transmembrane domain from amino acids 2-24, indicating that it is either a  
198 transmembrane or secreted protein. To determine the localization and topology of  
199 MsTtfA, we assessed the *in vivo* functionality of mCitrine fused at the N or C-terminus.  
200 Marker exchange with a plasmid encoding MsTtfA-mCitrine yielded kanamycin  
201 resistant, streptomycin sensitive transformants in similar numbers to pAJF792, encoding  
202 the wildtype gene, indicating the C-terminal fusion is functional. In contrast, the plasmid  
203 encoding an N-terminal mCitrine fusion did not yield kanamycin resistant, streptomycin  
204 sensitive transformants, indicating that this fusion failed to complement for essential  
205 function.

206 We next localized MsTtfA using live cell fluorescence microscopy. The C-terminal  
207 mCitrine fusion protein produced fluorescent signal at the cell poles and septa (Fig 3A,  
208 and Movie S3). It has been previously reported that mCitrine does not fluoresce when  
209 localized in the periplasm, suggesting that the C-terminal domain of MsTtfA is localized  
210 in the cytoplasmic side of the membrane [45]. We then generated an MsTtfA C-terminal  
211 fusion to msfGFP by recombination such that the fused copy was expressed from its  
212 endogenous locus and was the only copy, guaranteeing functionality. The resulting

213 MsTtfA-msfGFP strain demonstrated fluorescent signal exclusively at cell poles and  
214 septa (Movie S4). Fractionation of cell free supernatants showed no detectable MsTtfA-  
215 msfGFP in the supernatant (Fig 3B), suggesting that the protein is not secreted.  
216 Fractionation of the cell lysate showed that MsTtfA-msfGFP localized in the Triton-X100  
217 soluble fraction, similar to a membrane protein control FtsY, but not the soluble fraction  
218 marked by cytosolic RNAP $\beta$ , supporting that MsTtfA is membrane anchored, is not  
219 secreted, and has a cytoplasmic C-terminus.

### 220 **The essential portion of TtfA is conserved among mycolate producers**

221 To further delineate the functional domains of the protein, we examined the  
222 conservation of the protein sequence across homologs. BLAST searches identified  
223 homologous predicted proteins among mycolate producing organisms (Fig S1).  
224 Alignments of these homologs suggested that amino acids 1 through approximately 205  
225 were well conserved, with poor conservation in the C-terminal 73 amino acids (Fig S1).  
226 The C-terminal 73 amino acids are also predicted to be disordered [46]. This lack of  
227 conservation at the C-terminus was also apparent in the alignment with the MtbTtfA,  
228 which we demonstrate above is functional in *M. smegmatis* (Fig 2A). To assess the  
229 functional contribution of these conserved regions, we generated MsTtfA truncations  
230 fused at the C-terminus to msfGFP and assessed the ability of these truncations to  
231 complement the essential function by marker exchange. Only the plasmid encoding  
232 amino acids 1-205 yielded kanamycin resistant, streptomycin sensitive transformants,  
233 indicating that amino acids 1-205 were essential (Fig S2A).

234 After confirming that all of these truncations accumulate as stable proteins at  
235 their predicted sizes when expressed in wild type *M. smegmatis* (Fig S2A), we localized

236 each truncation by fluorescence microscopy. MsTtfA(1-205aa)-msfGFP localized to  
237 poles and septa in a pattern similar to the full-length protein (Fig S2B), indicating that  
238 the poorly conserved C-terminus is not required for essential function or proper  
239 localization. However, truncations shorter than 205AA, which did not complement  
240 essential function, also failed to localize to poles and septa, indicating that the first  
241 205AA of the protein, including the N terminal transmembrane domain, are required for  
242 proper localization and that this localization is tightly linked to its essential function.

### 243 **The N-terminus of TtfA is required for interaction with MmpL3**

244 To determine the regions of MsTtfA required for interaction with MmpL3, we  
245 immunopurified MsTtfA truncations fused to msfGFP when coexpressed with MmpL3-  
246 mCherry. MsTtfA-msfGFP was purified from DDM detergent solubilized lysates with  
247 GFPTrap resin. Unfused msfGFP did not coprecipitate MmpL3-mCherry, whereas full-  
248 length MsTtfA-msfGFP copurified with MmpL3-mCherry (Fig 4A). All truncations were  
249 visible at comparable levels in DDM solubilized lysates at their predicted sizes (Fig 4B).  
250 However, only MsTtfA(1-205aa)-msfGFP copurified with MmpL3-mCherry, quantitatively  
251 similar to full-length MsTtfA-msfGFP (Fig 4B). However, loss of any segment of MsTtfA  
252 within the first 205AA abolished interaction with MmpL3. These results demonstrate an  
253 exact correlation between the ability of MsTtfA to interact with MmpL3 and the essential  
254 function of this protein, suggesting that the essentiality of TtfA may be due to a role as  
255 an MmpL3 cofactor.

256 **The MmpL3 and MSMEG\_0736 complex and its localization is independent of**  
257 **TMM biosynthesis**

258 To examine whether the TtfA-MmpL3 interaction requires TMM synthesis, the substrate  
259 of the MmpL3 flippase, we depleted Pks13, the TMM synthetase in *M. smegmatis*  
260 [47,48]. Depletion of Pks13 in the MmpL3-mCherry/TtfA-msfGFP caused growth arrest  
261 after 6 hours of induction, indicative of depleting essential Pks13 (Fig S3) However,  
262 Pks13 depletion did not affect levels of either TtfA-msfGFP or MmpL3-mCherry in DDM  
263 solubilized lysates (data not shown), nor did depletion of Pks13 have any effect on the  
264 TtfA-msfGFP-MmpL3-mCherry complex (Fig 4C). These results indicate that active  
265 TMM biosynthesis is not required for TtfA-MmpL3 complex formation.

266 MmpL3-GFP has been previously reported to localize to cell poles and septa  
267 [49], a finding we confirm with our MmpL3-msfGFP strain, which localizes the MmpL3  
268 protein to poles and septa (Movie S5). This pattern is very similar to the pattern  
269 observed with TtfA-msfGFP (Movie S4). To colocalize MmpL3 and TtfA we again  
270 utilized strains co-expressing mCherry and msfGFP fusions to TtfA and MmpL3. By  
271 fluorescence microscopy, MmpL3 and TtfA strongly co-localized to cell poles and septa  
272 (Fig 5A) and were indistinguishable in their localization patterns. Depletion of Pks13 via  
273 CRISPRi led to cessation of growth between 6 and 9 hours, but did not affect  
274 localization of TtfA-msfGFP or MmpL3-msfGFP, again indicating that TMM synthesis  
275 was not required for localization of either protein to the poles or septa (Fig 5B). Taken  
276 together, these results strongly indicate that MmpL3 and TtfA form a complex *in vivo* at  
277 the site of cell growth.



278 **TtfA is required for MmpL3 TMM transport in *M. smegmatis* and *M. tuberculosis***

279 We next assessed whether TtfA is functionally required for TMM flipping. Loss of  
280 MmpL3 function via genetic or pharmacologic inhibition results in TMM accumulation  
281 and TDM depletion due to the inability of TMM to flip across the cytoplasmic membrane  
282 where Antigen85 enzymes process TMM to TDM and arabinogalactan attached mycolic  
283 acids [25-27]. To assess the functional role of TtfA in TMM flipping, we utilized CRISPRi  
284 strains that depleted TtfA or MmpL3, and a non-targeting control in *M. smegmatis*. 6  
285 hours after knockdown of gene expression, we labeled mycolic acids with <sup>14</sup>C-acetate  
286 and assessed TMM/TDM levels in cell wall organic extracts. Depletion of MmpL3 had  
287 the reported effect of <sup>14</sup>C-TMM accumulation and <sup>14</sup>C-TDM depletion (Fig 6A),  
288 attributable to MmpL3 dysfunction. Depletion of TtfA has a quantitatively similar effect  
289 on TMM transport as depletion of MmpL3, as shown by the TDM/TMM ratio in depleted  
290 cultures as compared to replete cultures (Fig 6A,B). As a control for essential protein  
291 depletion, we depleted the essential DnaK chaperone [43] and found no effect on <sup>14</sup>C-  
292 TMM/<sup>14</sup>C-TDM, indicating that cell arrest by depletion of any essential protein does not  
293 alter TMM and TDM levels (Fig S4).

294 We saw similar results in *M. tuberculosis* depleted of TtfA or MmpL3. Either TtfA  
295 or MmpL3 depletion impaired TMM transport, with the resulting accumulation of TMM  
296 and loss of TDM (Fig 6C,D). These results indicate that loss of the MmpL3 interacting  
297 protein TtfA impairs MmpL3 dependent TMM transport in both *M. smegmatis* and *M.*  
298 *tuberculosis*, strongly indicating that TtfA is an essential cofactor in MmpL3 function.

299

300 **An additional complex member is responsive to MmpL3 and TtfA depletion and**  
301 **inhibition of flippase activity**

302 MSMEG\_5308 was also found to co-purify with both MsTtfA and MmpL3 (Fig 1  
303 and Table 1). To further investigate this MmpL3 complex member, we generated a C-  
304 terminal msfGFP fusion to MSMEG\_5308 at the chromosomal locus. We then depleted  
305 either MmpL3 or TtfA in the MSMEG\_5308-msfGFP strain. Either MmpL3 or TtfA  
306 depletion, but not non-targeting control, led to accumulation of MSMEG\_5308 protein  
307 (Fig 7A). In contrast, CRISPRi depletion of Pks13 led to cessation of cell growth after 6  
308 hours of induction, but did not induce MSMEG\_5308 accumulation (Fig 7A).

309 We further examined the response of MSMEG\_5308 to inhibitors of the  
310 TMM/TDM pathway, including early mycolate biosynthesis (isoniazid (INH)), and  
311 inhibitors targeting late steps in TMM/TDM transport (SQ109, BM212, and AU1235).  
312 Resistance mutations to SQ109, BM212, and AU1235 arise in MmpL3, however only  
313 BM212 and AU1235 have been shown to directly inhibit MmpL3 flippase activity and all  
314 three inhibitors may have effects outside of MmpL3 flippase activity [24-26,50]. Both  
315 SQ109 and AU1235 caused MSMEG\_5308-msfGFP accumulation at 1.5 and 3 hours,  
316 but INH or BM212 (at 5 and 10  $\mu$ M) had no effect (Fig 7B and data not shown). The lack  
317 of accumulation of MSMEG\_5308 with INH treatment or Pks13 depletion suggests that  
318 MSMEG\_5308 does not accumulate in response to loss of TMM or TDM biosynthesis,  
319 but rather inhibition of their transport.

## 320 **MSMEG\_5308-msfGFP localizes to cell poles and septa and stabilizes**

### 321 **MmpL3/TtfA interaction**

322 The identification of MSMEG\_5308 as an MmpL3/TtfA interacting protein suggested  
323 that MSMEG\_5308 may co-localize with the MmpL3 complex. Indeed, MSMEG\_5308-  
324 msfGFP localized to cell poles and septa in a pattern similar to both TtfA-msfGFP and  
325 MmpL3-msfGFP by live cell fluorescence microscopy (Fig 8A). To examine the role of  
326 MSMEG\_5308, we targeted *MSMEG\_5308* using CRISPRi and verified efficient  
327 knockdown using a MSMEG\_5308-msfGFP strain (Fig S5). Depletion of MSMEG\_5308  
328 had no impact growth or cell morphology, confirming MSMEG\_5308 was not essential  
329 in *M. smegmatis* (data not shown).

330 To assess the effect of MSMEG\_5308 on MmpL3/TtfA complexes, we isolated  
331 TtfA-msfGFP using anti-GFP nanobodies and probed for MmpL3-mCherry in the  
332 presence and absence of MSMEG\_5308. In DDM solubilized lysates, TtfA copurified  
333 with MmpL3-mCherry in MSMEG\_5308 depleted lysates similarly to control cells (Fig  
334 8B). However, in Triton X-100 solubilized lysates, although the MmpL3-TtfA complex  
335 was intact when MSMEG\_5308 was present, TtfA-msfGFP did not coprecipitate  
336 MmpL3-mCherry in the absence of MSMEG\_5308 (Fig 8B). These results indicate that  
337 MSMEG\_5308 is a nonessential member of the MmpL3 complex that is induced by  
338 stress and stabilizes the MmpL3-TtfA protein complex.

339

## 340 **Discussion**

341 We have identified two new components of the essential machinery of mycolic acid  
342 transport and cell growth in mycobacteria. The MmpL3 transporter was previously

343 known to transport trehalose monomycolate, but its cofactors were unknown. The  
344 MmpL3 machinery contains the essential protein TtfA, which we show is required for  
345 TMM flipping across the cytoplasmic membrane. A third complex member,  
346 MSMEG\_5308, while not required for TMM transport, appears to stabilize the MmpL3  
347 complex and is upregulated in response to MmpL3 dysfunction. All three of these  
348 proteins localize to cell poles and septa, which are the sites of cell elongation and the  
349 previously reported localization sites of early mycolic acid synthetic machinery such as  
350 MabA and InhA [49].

351 TtfA, a protein with no predicted domains of known function, is an essential  
352 component of the mycolic acid transport machinery. We have defined the essential  
353 portions of TtfA, amino acids 1-205 that includes the N-terminal transmembrane domain  
354 but not the poorly conserved disordered C-terminus. Using coprecipitation techniques,  
355 we see that truncations that disrupt localization and interaction with MmpL3 fail to  
356 support the essential TMM transport function of MmpL3. Our model for the molecular  
357 function of TtfA in TMM transport is that the protein links the mycolate biosynthetic  
358 machinery to the MmpL3 transporter, possibly by binding directly to TMM. MmpL3 is  
359 distinct from several other MmpL proteins in that disruption of the transporter does not  
360 inhibit synthesis of the transported lipid. For several MmpL proteins, transport and  
361 synthesis are linked. For example, deletion of the sulfolipid transporter MmpL8  
362 abolishes sulfolipid synthesis, rather than simply inhibiting its transport [16,51].  
363 Similarly, MmpL7 is physically and functionally coupled to PDIM biosynthesis [52].  
364 However, the lack of such coupling in the MmpL3 system may suggest that a coupling

365 protein is required to chaperone the transported glycolipid to the transporter, a function  
366 we hypothesize for TtfA.

367 Alternatively, it is possible that that TtfA is a scaffolding protein that nucleates  
368 additional essential MmpL3 complex members yet to be elucidated. TtfA has been  
369 previously shown to interact with the non-essential vesiculogenesis regulator VirR in *M.*  
370 *tuberculosis*, that we also find in our purifications of MsTtfA [53].

371 The second protein we identify in the MmpL3 complex, MSMEG\_5308, is a seven  
372 bladed propeller protein. This protein structural motif has been previously described to  
373 aid in protein-protein interactions though members are functionally diverse [54-56]. In  
374 *Mtb*, the MSMEG\_5308 homolog, Rv1057, is responsive to a variety of membrane  
375 stresses as well as MmpL3 depletion. Our data indicates that the function of  
376 MSMEG\_5308 is to stabilize the MmpL3/TtfA complex. We hypothesize that  
377 MSMEG\_5308 is upregulated during times of membrane stress in order to stabilize  
378 MmpL3 complexes and preserve TMM transport and cell wall biosynthesis in conditions  
379 that may dissociate the MmpL3 complex.

380 MmpL3 mediated TMM transport has emerged as an attractive drug target after  
381 several high throughput screens identified whole cell active inhibitors that appear to  
382 target this transporter. Our identification of two previously unidentified cofactors for  
383 MmpL3 will empower future studies to investigate these proteins as drug targets and  
384 their potential roles in cellular response and resistance to MmpL3 targeting small  
385 molecules. Additionally, future biochemical and structural studies will examine the  
386 biochemical and structural organization of this essential mycolic acid transport complex.

## 387 **Methods**

### 388 **Bacterial and DNA manipulations**

389 Standard procedures were used to manipulate recombinant DNA and to transform *E.*  
390 *coli*. *M. smegmatis* strains were derivatives of *mc<sup>2</sup>155* [60]. *M. tuberculosis* strains are  
391 derivatives of Erdman. Gene deletions were made by homologous recombination and  
392 double negative selection [61]. All strains used in this study are listed in Table S2.  
393 Plasmids including relevant features, and primers are listed in Table S3 and S4. *M.*  
394 *smegmatis* and *M. tuberculosis* was transformed by electroporation (2500V, 2.5 $\mu$ F,  
395 1000 $\Omega$ ). All *M. smegmatis* strains were cultured in LB with 0.5% glycerol, 0.5% dextrose  
396 (LBsmeg) or 7H9 media. *M. tuberculosis* was growth in 7H9<sub>OADC</sub>. 0.05% Tween<sub>80</sub> was  
397 added to all liquid media. Antibiotic concentrations used for selection of *M. smegmatis*  
398 and *M. tuberculosis* strains were as follows: kanamycin 20 $\mu$ g/ml, hygromycin 50 $\mu$ g/ml,  
399 streptomycin 20 $\mu$ g/ml. For CRISPRi knockdowns anhydrotetracycline (ATc) was used at  
400 50ng/ml (*smegmatis*) or 100ng/ml (*Mtb*).

### 401 **Immunoblotting**

402 For protein and epitope tag detection, GFP (Rockland Immunochemicals, Rabbit Anti-  
403 GFP polyclonal antibody, 1mg/ml, 1:20,000), mCherry (Rockland Immunochemicals,  
404 Rabbit Anti-RFP polyclonal antibody, 1mg/ml, 1:20,000), and RNAP- $\beta$  (Neoclone,  
405 8RB13 Mouse Anti-*E. coli* RNAP $\beta$  monoclonal, 1:20,000), Ag85 (BEI Resources, Rabbit  
406 polyclonal antibody, 1:20000).

### 407 **Microscopy**

408 All images were acquired using a Zeiss Axio Observer Z1 microscope equipped with  
409 Definite focus, Stage top incubator (Insert P Lab-Tek S1, TempModule S1), Colibri.2

410 and Illuminator HXP 120 C light sources, a Hamamatsu ORCA-Flash4.0 CMOS Camera  
411 and a Plan-Apochromat 100x/1.4 oil DIC objective. Zeiss Zen software was used for  
412 acquisition and image export. The following filter sets and light sources were used for  
413 imaging: GFP (38 HE, Colibri2.0 470 LED), mCherry (64 HE, Colibri2.0 590 LED). YFP  
414 (46 HE, Colibri2.0 505 LED) and FM 4-64 (20, HXP 120 C). For cell staining 100µl of  
415 culture was used. A final concentration of 1µg/ml FM 4-64 (Invitrogen) was added. Cells  
416 were pelleted by centrifugation at 5000g for 1 minute and resuspended in 50µl of media.  
417 For single time point live cell imaging, 7µl of culture was spotted onto a No. 1.5  
418 coverslip and pressed to a slide. For time-lapse microscopy, cells were added to a 1.5%  
419 Low melting point agarose LBsmeg pad. For pad preparation, LBsmeg agarose was  
420 heated to 65°C and poured into a 17x28mm geneframe (Thermoscientific, AB-0578)  
421 adhered to a 25x75mm glass slide. A second slide was pressed down on top and the  
422 set-up was allowed to cool at room temperature for 10 minutes. The top slide was  
423 removed and the pad was cut and removed so that a 3-4mm strip remained near the  
424 center. 2-3µl of *M. smegmatis* culture was added to the pad and a No. 1.5 24x40mm  
425 coverglass was sealed to the geneframe. Slides were incubated in stage top incubator  
426 at 37°C. For timelaspse microscopy cells were incubated in CellAsic ONIX microfluidic  
427 system (plates for bacterial cell culture, B04A) at a flow (psi) of 2.0 and heated at 37°C.  
428 Cells were equilibrated in plates at 37°C for 3 hours prior to the start of imaging. Cell  
429 length were quantitated using Zeiss Zen software.

430

431 **<sup>14</sup>C-Acetic Acid labeling and TLC**

432 *M. smegmatis* and *M. tuberculosis* cultures were grown and depleted for the following  
433 times: *M. smegmatis* CRISPRi 6 hours in ATc-50ng/ml, *M. smegmatis* Tet-DnaK 16  
434 hours without ATc, and *M. tuberculosis* CRISPRi 26 hours in ATc-100ng/ml. For TMM  
435 and TDM labeling 1ml of culture was removed and labeled for 1 hour with 1ul for *M.*  
436 *smegmatis* or 16 hours with 2ul for *M. tuberculosis* using [1-<sup>14</sup>C]-Acetic Acid, Sodium  
437 Salt (Perkin Elmer, NEC084H001MC, 1 mCi/mL). For INH controls, 20ug/ml INH was  
438 added 5 minutes prior to label addition. After incubation cells were harvested by  
439 centrifugation at 10,000g for 5 minutes and supernatant was removed. The pellet was  
440 resuspended in 500ul chloroform:methanol (2:1) and incubated at 37C for 2 hours. Cells  
441 and debris was pelleted at 10,000g for 5 minutes and the supernatant was removed.  
442 10ul of chloroform:methanol extraction was spotted on HPTLC plates and run 3 times in  
443 chloroform:methanol:water (90:10:1), then allowed to air dry and imaged using a  
444 Phosphor storage cassette and Typhoon Trio (pixel size 200 microns at best sensitivity).  
445 ImageJ64 was used to quantitate the radioactive signal.

446

#### 447 **Protein expression and purification**

448 Endogenous MSMEG\_0736 and MSMEG\_0250 were purified from *MSMEG mc<sup>2</sup>155*  
449 expressing native MSMEG\_0736 and MSMEG\_0250 with a C-terminal msfGFP-tag.  
450 *MSMEG* strains were grown in 7H9 with 0.05% (v/v) Tween<sub>80</sub>. Harvested cells were  
451 washed three times with PBS and frozen before lysis with a cryogenic grinder (SPEX  
452 SamplePrep). The powder was resuspended in 50 mM Tris-HCl pH 7.5, 150 mM NaCl,  
453 protease inhibitor cocktail (Sigma-Aldrich) and 0.6-0.7 units/ml Benzonase  
454 endonuclease and the solution was incubated for 30 min. Solutions were centrifuged at



455 15,000 g for 30 min, followed by centrifugation at 98,000 g - 99,594 g (depending on  
456 amount of material) for 1 h to isolate the membranes. Membranes were solubilized for 1  
457 h at 4°C in 50 mM Tris-HCl pH 7.5, 150 mM NaCl and 1% DDM using a 1:10 (w/w) ratio  
458 of detergent to membranes. MSMEG\_0410 was solubilized using a 1:6.77 (w/w) ratio of  
459 detergent to membranes. The solutions were centrifuged for 30 min at 99,526 g -  
460 103,530 g. Solubilized membranes were incubated with GFP-Trap\_MA beads  
461 (Chromotek) for 1 h at 4°C. The beads were washed three times with 50 mM Tris-HCl  
462 pH 7.5, 150 mM NaCl and 0.2% DDM. Proteins were eluted from the beads by the  
463 addition of 0.2 M glycine pH 2.5 and the eluate was neutralized with 1 M Tris base pH  
464 10.4. The elution was repeated a second time.

465

#### 466 **Mass spectrometry**

467 The two GFP-Trap\_MA elutions were pooled and proteins were precipitated with  
468 trichloroacetic acid. The pellets were resuspended in 0.1% Rapigest in 50 mM  
469 ammonium bicarbonate. Samples were prepared for mass spectrometry analysis as  
470 previously described [57]. Samples were denatured and reduced in a buffer containing  
471 2M urea and 2 mM DTT. Free cysteines were alkylated by addition of 2 mM  
472 iodoacetamide. The reduced and alkylated samples were then digested with trypsin  
473 overnight at 37C. Digested samples were desalted using UltraMicroSpin C18 columns  
474 (Nest Group) and then evaporated to dryness. Samples were resuspended in 0.1%  
475 formic acid for mass spectrometry analysis.

476 Samples were analyzed on a Thermo Scientific Orbitrap Fusion mass  
477 spectrometry system equipped with an Easy nLC 1200 ultra-high pressure liquid

478 chromatography system interfaced via a nanoelectrospray source. Samples were  
479 injected onto a C18 reverse phase capillary column (75  $\mu$ m inner diameter x 25 cm  
480 length, packed with 1.9  $\mu$ m C18 particles). Peptides were then separated by an organic  
481 gradient from 5% to 30% ACN in 0.1% formic acid over 180 minutes at a flow rate of  
482 300 nl/min. The MS continuously collected spectra in a data-dependent fashion over the  
483 entire gradient.

484 Raw mass spectrometry data were analyzed using the MaxQuant software package  
485 (version 1.3.0.5) [58]. Data were matched to the *Mycobacterium smegmatis* UniProt  
486 reference proteome database. Variable modifications were allowed for methionine  
487 oxidation, and protein N-terminus acetylation. A fixed modification was indicated for  
488 cysteine carbamidomethylation. Full trypsin specificity was required. The first search  
489 was performed with a mass accuracy of +/- 20 parts per million and the main search  
490 was performed with a mass accuracy of +/- 6 parts per million. A maximum of 5  
491 modifications were allowed per peptide. A maximum of 2 missed cleavages were  
492 allowed. The maximum charge allowed was 7+. Individual peptide mass tolerances  
493 were allowed. For MS/MS matching, a mass tolerance of 0.5 Da was allowed and the  
494 top 6 peaks per 100 Da were analyzed. MS/MS matching was allowed for higher charge  
495 states, water and ammonia loss events. Data were searched against a concatenated  
496 database containing all sequences in both forward and reverse directions with reverse  
497 hits indicating the false discovery rate of identifications. The data were filtered to obtain  
498 a peptide, protein, and site-level false discovery rate of 0.01. The minimum peptide  
499 length was 7 amino acids.

500 Protein identification from a single SDS-PAGE band was performed by the Taplin

501 Mass Spectrometry Facility at Harvard Medical School. The gel band corresponding to  
502 the molecular weight of MmpL3 was excised from the gel and subjected to in-gel trypsin  
503 digestion. Excised gel bands were cut into approximately 1 mm<sup>3</sup> pieces. Gel pieces  
504 were then subjected to a modified in-gel trypsin digestion procedure [59]. Gel pieces  
505 were washed and dehydrated with acetonitrile for 10 min. followed by removal of  
506 acetonitrile. Pieces were then completely dried in a speed-vac. Rehydration of the gel  
507 pieces was with 50 mM ammonium bicarbonate solution containing 12.5 ng/μl modified  
508 sequencing-grade trypsin (Promega, Madison, WI) at 4°C. After 45 min., the excess  
509 trypsin solution was removed and replaced with 50 mM ammonium bicarbonate solution  
510 to just cover the gel pieces. Samples were then placed in a 37°C room overnight.  
511 Peptides were later extracted by removing the ammonium bicarbonate solution,  
512 followed by one wash with a solution containing 50% acetonitrile and 1% formic acid.  
513 The extracts were then dried in a speed-vac (~1 hr). The samples were then stored at  
514 4°C until analysis.  
515 On the day of analysis the samples were reconstituted in 5 - 10 μl of HPLC solvent A  
516 (2.5% acetonitrile, 0.1% formic acid). A nano-scale reverse-phase HPLC capillary  
517 column was created by packing 2.6 μm C18 spherical silica beads into a fused silica  
518 capillary (100 μm inner diameter x ~30 cm length) with a flame-drawn tip [60]. After  
519 equilibrating the column each sample was loaded via a Famos auto sampler (LC  
520 Packings, San Francisco CA) onto the column. A gradient was formed and peptides  
521 were eluted with increasing concentrations of solvent B (97.5% acetonitrile, 0.1% formic  
522 acid).

523 As peptides eluted they were subjected to electrospray ionization and then entered into  
524 an LTQ Orbitrap Velos Pro ion-trap mass spectrometer (Thermo Fisher Scientific,  
525 Waltham, MA). Peptides were detected, isolated, and fragmented to produce a tandem  
526 mass spectrum of specific fragment ions for each peptide. Peptide sequences (and  
527 hence protein identity) were determined by matching protein databases with the  
528 acquired fragmentation pattern by the software program, Sequest (Thermo Fisher  
529 Scientific, Waltham, MA) [61]. All databases include a reversed version of all the  
530 sequences and the data was filtered to between a one and two percent peptide false  
531 discovery rate.

532 **GFPTrap pulldowns of MsTtfA Truncations and MsTtfA-msfGFP with CRISPRi**  
533 **depletion**

534 10ml of LBsmeg culture of MsTfA-msfGFP truncations and MmpL3-mCherry co-  
535 expression strains were grown to OD<sub>600</sub> 0.5 overnight at 37C. 50ml of LBsmeg of TtfA-  
536 msfGFP truncations and MmpL3-mCherry co-expression strains with CRISPRi targeting  
537 constructs were grown to OD<sub>600</sub> 0.5. For non-targeting and MSMEG\_5308 depletion  
538 strains were grown with ATc-50ng/ml for 24 hours and Pks13 depletion strains were  
539 grown with ATc for 6 hours. Cultures were cooled on ice and cells were harvested by  
540 centrifugation (3700g, 10 min, 4°C). Pellets were washed once with 1ml of PBS. Pellets  
541 were resuspended in 500ul PBS with 1x HALT protease (Thermo Scientific) and lysed  
542 via bead beating (Biospec, Mini-beadbeater-16) 2 times for 1 min with 5 min on ice  
543 between. Beads, unbroken cells, and debris were pelleted at 5000g for 10 min at 4°C.  
544 Supernatant was collected and an additional 500ul of PBS containing either 1% DDM or  
545 1% Triton X-100 was added and incubated at 4°C for 1 hour with rocking. Insoluble

546 material was then pelleted at 21130g for 1 hour at 4°C and the supernatant (~1ml) was  
547 collected and added to 20ul pre-washed GFPTrap magnetic agarose beads (Bulldog  
548 Bio) and incubated for 2 hours at 4°C with rocking. After incubation beads were  
549 collected with a magnet and washed 3 times with 1mL PBS and 0.1% DDM or Triton X-  
550 100. Elution was done using SDS sample buffer and heating 60°C for 15 min.

551

552

553

## 554 Bibliography

- 555 1. Banerjee A, Dubnau E, Quemard A, Balasubramanian V, Um KS, et al. (1994) inhA, a gene  
556 encoding a target for isoniazid and ethionamide in *Mycobacterium tuberculosis*. *Science*  
557 263: 227-230.
- 558 2. Goude R, Amin AG, Chatterjee D, Parish T (2009) The arabinosyltransferase EmbC is inhibited  
559 by ethambutol in *Mycobacterium tuberculosis*. *Antimicrob Agents Chemother* 53: 4138-  
560 4146.
- 561 3. Telenti A, Philipp WJ, Sreevatsan S, Bernasconi C, Stockbauer KE, et al. (1997) The emb  
562 operon, a gene cluster of *Mycobacterium tuberculosis* involved in resistance to  
563 ethambutol. *Nat Med* 3: 567-570.
- 564 4. Bergeret F, Gavalda S, Chalut C, Malaga W, Quemard A, et al. (2012) Biochemical and  
565 structural study of the atypical acyltransferase domain from the mycobacterial  
566 polyketide synthase Pks13. *J Biol Chem* 287: 33675-33690.
- 567 5. Gavalda S, Bardou F, Laval F, Bon C, Malaga W, et al. (2014) The polyketide synthase Pks13  
568 catalyzes a novel mechanism of lipid transfer in mycobacteria. *Chem Biol* 21: 1660-1669.
- 569 6. Lea-Smith DJ, Pyke JS, Tull D, McConville MJ, Coppel RL, et al. (2007) The reductase that  
570 catalyzes mycolic motif synthesis is required for efficient attachment of mycolic acids to  
571 arabinogalactan. *J Biol Chem* 282: 11000-11008.
- 572 7. Pacheco SA, Hsu FF, Powers KM, Purdy GE (2013) MmpL11 protein transports mycolic acid-  
573 containing lipids to the mycobacterial cell wall and contributes to biofilm formation in  
574 *Mycobacterium smegmatis*. *J Biol Chem* 288: 24213-24222.
- 575 8. Barkan D, Hedhli D, Yan HG, Huygen K, Glickman MS (2012) *Mycobacterium tuberculosis*  
576 lacking all mycolic acid cyclopropanation is viable but highly attenuated and  
577 hyperinflammatory in mice. *Infect Immun* 80: 1958-1968.
- 578 9. Barkan D, Liu Z, Sacchettini JC, Glickman MS (2009) Mycolic acid cyclopropanation is essential  
579 for viability, drug resistance, and cell wall integrity of *Mycobacterium tuberculosis*.  
580 *Chem Biol* 16: 499-509.
- 581 10. Glickman MS (2003) The mmaA2 gene of *Mycobacterium tuberculosis* encodes the distal  
582 cyclopropane synthase of the alpha-mycolic acid. *J Biol Chem* 278: 7844-7849.
- 583 11. Glickman MS, Cahill SM, Jacobs WR, Jr. (2001) The *Mycobacterium tuberculosis* cmaA2 gene  
584 encodes a mycolic acid trans-cyclopropane synthetase. *J Biol Chem* 276: 2228-2233.
- 585 12. Glickman MS, Cox JS, Jacobs WR, Jr. (2000) A novel mycolic acid cyclopropane synthetase is  
586 required for cording, persistence, and virulence of *Mycobacterium tuberculosis*. *Mol Cell*  
587 5: 717-727.
- 588 13. Huang CC, Smith CV, Glickman MS, Jacobs WR, Jr., Sacchettini JC (2002) Crystal structures of  
589 mycolic acid cyclopropane synthases from *Mycobacterium tuberculosis*. *J Biol Chem*  
590 277: 11559-11569.
- 591 14. Rao V, Gao F, Chen B, Jacobs WR, Jr., Glickman MS (2006) Trans-cyclopropanation of  
592 mycolic acids on trehalose dimycolate suppresses *Mycobacterium tuberculosis*-induced  
593 inflammation and virulence. *J Clin Invest* 116: 1660-1667.

- 594 15. Domenech P, Reed MB, Barry CE, 3rd (2005) Contribution of the Mycobacterium  
595 tuberculosis MmpL protein family to virulence and drug resistance. *Infect Immun* 73:  
596 3492-3501.
- 597 16. Converse SE, Mougous JD, Leavell MD, Leary JA, Bertozzi CR, et al. (2003) MmpL8 is required  
598 for sulfolipid-1 biosynthesis and Mycobacterium tuberculosis virulence. *Proc Natl Acad*  
599 *Sci U S A* 100: 6121-6126.
- 600 17. Bernut A, Viljoen A, Dupont C, Sapriel G, Blaise M, et al. (2016) Insights into the smooth-to-  
601 rough transitioning in Mycobacterium boletii unravels a functional Tyr residue  
602 conserved in all mycobacterial MmpL family members. *Mol Microbiol* 99: 866-883.
- 603 18. Szekely R, Cole ST (2016) Mechanistic insight into mycobacterial MmpL protein function.  
604 *Mol Microbiol* 99: 831-834.
- 605 19. Sasseti CM, Boyd DH, Rubin EJ (2003) Genes required for mycobacterial growth defined by  
606 high density mutagenesis. *Mol Microbiol* 48: 77-84.
- 607 20. Sasseti CM, Rubin EJ (2003) Genetic requirements for mycobacterial survival during  
608 infection. *Proc Natl Acad Sci U S A* 100: 12989-12994.
- 609 21. Stec J, Onajole OK, Lun S, Guo H, Merenbloom B, et al. (2016) Indole-2-carboxamide-based  
610 MmpL3 Inhibitors Show Exceptional Antitubercular Activity in an Animal Model of  
611 Tuberculosis Infection. *J Med Chem* 59: 6232-6247.
- 612 22. Lun S, Guo H, Onajole OK, Pieroni M, Gunosewoyo H, et al. (2013) Indoleamides are active  
613 against drug-resistant Mycobacterium tuberculosis. *Nat Commun* 4: 2907.
- 614 23. Rao SP, Lakshminarayana SB, Kondreddi RR, Herve M, Camacho LR, et al. (2013)  
615 Indolcarboxamide is a preclinical candidate for treating multidrug-resistant tuberculosis.  
616 *Sci Transl Med* 5: 214ra168.
- 617 24. La Rosa V, Poce G, Canseco JO, Buroni S, Pasca MR, et al. (2012) MmpL3 is the cellular target  
618 of the antitubercular pyrrole derivative BM212. *Antimicrob Agents Chemother* 56: 324-  
619 331.
- 620 25. Xu Z, Meshcheryakov VA, Poce G, Chng SS (2017) MmpL3 is the flippase for mycolic acids in  
621 mycobacteria. *Proc Natl Acad Sci U S A* 114: 7993-7998.
- 622 26. Grzegorzewicz AE, Pham H, Gundi VA, Scherman MS, North EJ, et al. (2012) Inhibition of  
623 mycolic acid transport across the Mycobacterium tuberculosis plasma membrane. *Nat*  
624 *Chem Biol* 8: 334-341.
- 625 27. Varela C, Rittmann D, Singh A, Krumbach K, Bhatt K, et al. (2012) MmpL genes are  
626 associated with mycolic acid metabolism in mycobacteria and corynebacteria. *Chem Biol*  
627 19: 498-506.
- 628 28. Zhang B, Li J, Yang X, Wu L, Zhang J, et al. (2019) Crystal Structures of Membrane  
629 Transporter MmpL3, an Anti-TB Drug Target. *Cell* 176: 636-648 e613.
- 630 29. Viljoen A, Dubois V, Girard-Misguich F, Blaise M, Herrmann JL, et al. (2017) The diverse  
631 family of MmpL transporters in mycobacteria: from regulation to antimicrobial  
632 developments. *Mol Microbiol* 104: 889-904.
- 633 30. Costa TR, Felisberto-Rodrigues C, Meir A, Prevost MS, Redzej A, et al. (2015) Secretion  
634 systems in Gram-negative bacteria: structural and mechanistic insights. *Nat Rev*  
635 *Microbiol* 13: 343-359.



- 636 31. Koronakis V, Sharff A, Koronakis E, Luisi B, Hughes C (2000) Crystal structure of the bacterial  
637 membrane protein TolC central to multidrug efflux and protein export. *Nature* 405: 914-  
638 919.
- 639 32. Du D, Wang Z, James NR, Voss JE, Klimont E, et al. (2014) Structure of the AcrAB-TolC  
640 multidrug efflux pump. *Nature* 509: 512-515.
- 641 33. Daury L, Orange F, Taveau JC, Verchere A, Monlezun L, et al. (2016) Tripartite assembly of  
642 RND multidrug efflux pumps. *Nat Commun* 7: 10731.
- 643 34. Murakami S, Nakashima R, Yamashita E, Yamaguchi A (2002) Crystal structure of bacterial  
644 multidrug efflux transporter AcrB. *Nature* 419: 587-593.
- 645 35. Murakami S, Nakashima R, Yamashita E, Matsumoto T, Yamaguchi A (2006) Crystal  
646 structures of a multidrug transporter reveal a functionally rotating mechanism. *Nature*  
647 443: 173-179.
- 648 36. Seeger MA, Schiefner A, Eicher T, Verrey F, Diederichs K, et al. (2006) Structural asymmetry  
649 of AcrB trimer suggests a peristaltic pump mechanism. *Science* 313: 1295-1298.
- 650 37. Fu J, Zong G, Zhang P, Gu Y, Cao G (2018) Deletion of the beta-Propeller Protein Gene  
651 Rv1057 Reduces ESAT-6 Secretion and Intracellular Growth of Mycobacterium  
652 tuberculosis. *Curr Microbiol* 75: 401-409.
- 653 38. Pang X, Cao G, Neuenschwander PF, Haydel SE, Hou G, et al. (2011) The beta-propeller gene  
654 Rv1057 of Mycobacterium tuberculosis has a complex promoter directly regulated by  
655 both the MprAB and TrcRS two-component systems. *Tuberculosis (Edinb)* 91 Suppl 1:  
656 S142-149.
- 657 39. Haydel SE, Clark-Curtiss JE (2006) The Mycobacterium tuberculosis TrcR response regulator  
658 represses transcription of the intracellularly expressed Rv1057 gene, encoding a seven-  
659 bladed beta-propeller. *J Bacteriol* 188: 150-159.
- 660 40. Manganello R, Voskuil MI, Schoolnik GK, Smith I (2001) The Mycobacterium tuberculosis ECF  
661 sigma factor sigmaE: role in global gene expression and survival in macrophages. *Mol*  
662 *Microbiol* 41: 423-437.
- 663 41. Degiacomi G, Benjak A, Madacki J, Boldrin F, Provvedi R, et al. (2017) Essentiality of mmpL3  
664 and impact of its silencing on Mycobacterium tuberculosis gene expression. *Sci Rep* 7:  
665 43495.
- 666 42. Griffin JE, Gawronski JD, Dejesus MA, Ioerger TR, Akerley BJ, et al. (2011) High-resolution  
667 phenotypic profiling defines genes essential for mycobacterial growth and cholesterol  
668 catabolism. *PLoS Pathog* 7: e1002251.
- 669 43. Fay A, Glickman MS (2014) An essential nonredundant role for mycobacterial DnaK in native  
670 protein folding. *PLoS Genet* 10: e1004516.
- 671 44. Rock JM, Hopkins FF, Chavez A, Diallo M, Chase MR, et al. (2017) Programmable  
672 transcriptional repression in mycobacteria using an orthogonal CRISPR interference  
673 platform. *Nat Microbiol* 2: 16274.
- 674 45. Feilmeier BJ, Iseminger G, Schroeder D, Webber H, Phillips GJ (2000) Green fluorescent  
675 protein functions as a reporter for protein localization in Escherichia coli. *J Bacteriol* 182:  
676 4068-4076.
- 677 46. Yang ZR, Thomson R, McNeil P, Esnouf RM (2005) RONN: the bio-basis function neural  
678 network technique applied to the detection of natively disordered regions in proteins.  
679 *Bioinformatics* 21: 3369-3376.



- 680 47. Gavalda S, Leger M, van der Rest B, Stella A, Bardou F, et al. (2009) The Pks13/FadD32  
681 crosstalk for the biosynthesis of mycolic acids in *Mycobacterium tuberculosis*. *J Biol*  
682 *Chem* 284: 19255-19264.
- 683 48. Leger M, Gavalda S, Guillet V, van der Rest B, Slama N, et al. (2009) The dual function of the  
684 *Mycobacterium tuberculosis* FadD32 required for mycolic acid biosynthesis. *Chem Biol*  
685 16: 510-519.
- 686 49. Carel C, Nukdee K, Cantaloube S, Bonne M, Diagne CT, et al. (2014) *Mycobacterium*  
687 *tuberculosis* proteins involved in mycolic acid synthesis and transport localize  
688 dynamically to the old growing pole and septum. *PLoS One* 9: e97148.
- 689 50. Tahlan K, Wilson R, Kastrinsky DB, Arora K, Nair V, et al. (2012) SQ109 targets MmpL3, a  
690 membrane transporter of trehalose monomycolate involved in mycolic acid donation to  
691 the cell wall core of *Mycobacterium tuberculosis*. *Antimicrob Agents Chemother* 56:  
692 1797-1809.
- 693 51. Domenech P, Reed MB, Dowd CS, Manca C, Kaplan G, et al. (2004) The role of MmpL8 in  
694 sulfatide biogenesis and virulence of *Mycobacterium tuberculosis*. *J Biol Chem* 279:  
695 21257-21265.
- 696 52. Jain M, Cox JS (2005) Interaction between polyketide synthase and transporter suggests  
697 coupled synthesis and export of virulence lipid in *M. tuberculosis*. *PLoS Pathog* 1: e2.
- 698 53. Rath P, Huang C, Wang T, Wang T, Li H, et al. (2013) Genetic regulation of vesiculogenesis  
699 and immunomodulation in *Mycobacterium tuberculosis*. *Proc Natl Acad Sci U S A* 110:  
700 E4790-4797.
- 701 54. Fulop V, Jones DT (1999) Beta propellers: structural rigidity and functional diversity. *Curr*  
702 *Opin Struct Biol* 9: 715-721.
- 703 55. Chaudhuri I, Soding J, Lupas AN (2008) Evolution of the beta-propeller fold. *Proteins* 71:  
704 795-803.
- 705 56. Chen CK, Chan NL, Wang AH (2011) The many blades of the beta-propeller proteins:  
706 conserved but versatile. *Trends Biochem Sci* 36: 553-561.
- 707 57. Jager S, Cimermancic P, Gulbahce N, Johnson JR, McGovern KE, et al. (2011) Global  
708 landscape of HIV-human protein complexes. *Nature* 481: 365-370.
- 709 58. Cox J, Mann M (2008) MaxQuant enables high peptide identification rates, individualized  
710 p.p.b.-range mass accuracies and proteome-wide protein quantification. *Nat Biotechnol*  
711 26: 1367-1372.
- 712 59. Shevchenko A, Wilm M, Vorm O, Mann M (1996) Mass spectrometric sequencing of  
713 proteins silver-stained polyacrylamide gels. *Anal Chem* 68: 850-858.
- 714 60. Peng J, Gygi SP (2001) Proteomics: the move to mixtures. *J Mass Spectrom* 36: 1083-1091.
- 715 61. Eng JK, McCormack AL, Yates JR (1994) An approach to correlate tandem mass spectral data  
716 of peptides with amino acid sequences in a protein database. *J Am Soc Mass Spectrom*  
717 5: 976-989.

718  
719  
720 **Acknowledgements:**

721 This work is supported by AI-U19-111143 (the Tri-I TBRU, part of the TBRU-Network,  
722 R01 AI120694, P01 AI063302, P30 CA008748, 5R01AI128214, 1U19AI135990,  
723 and P01AI095208.

724

725

726 **Table 1**

727 MSMEG\_0736 and MSMEG\_0250 protein-protein interactions. Shown is the number of  
728 unique peptides detected in the GFP-Trap eluates using MSMEG\_0736-msfGFP or  
729 MSMEG\_0250-msfGFP as bait. Only the three proteins with the highest peptides are  
730 shown.

731

732

| <b>Bait</b>           | <b>ProtID</b> | <b>Name</b> | <b>Num unique<sup>3</sup> peptides</b> |
|-----------------------|---------------|-------------|----------------------------------------|
| MSMEG_0736            | A0QP27        | MSMEG_0250  | 35                                     |
|                       | A0QQF4        | MSMEG_0736  | 22                                     |
|                       | A0R316        | MSMEG_5308  | 14                                     |
| MSMEG_0250<br>(MmpL3) | A0QP27        | MSMEG_0250  | 57                                     |
|                       | A0QQF4        | MSMEG_0736  | 11                                     |
|                       | A0R316        | MSMEG_5308  | 15                                     |

734

## 735 **Figure Legends**

### 736 **Figure 1. MmpL3 and MSMEG\_0736 form a complex**

737 **A.** Silver stained SDS PAGE gel of elutions from GFP-Trap columns loaded with lysates  
738 from *M. smegmatis* expressing MSMEG\_0736-msfGFP or MmpL3-msfGFP  
739 (MSmeg\_0250). See Table 1 for protein identifications.

740 **B.** Silver stained SDS PAGE gel of the first elution from a GFP-Trap column loaded with  
741 a lysate from *M. smegmatis* expressing MSMEG\_0736-msfGFP. The band  
742 corresponding to the molecular weight of MmpL3, indicated with an asterisk, was  
743 excised and subjected for mass spectrometry analysis and identified as MmpL3 (see  
744 methods and Table S2).

745

### 746 **Figure 2. MsTtfA /Mtb TtfA are required for mycobacterial growth and cell**

747 **elongation.** (A) (Left) *M. smegmatis* strains carrying deletion in chromosomal *ttfA* and a  
748 copy of *ttfA* at the *attB* phage integration site were subjected to marker exchange  
749 with *attB* integrating vectors.  $\Delta ttfA$  *attB::ttfA* *strep* (MGM6414) transformed with  
750 pMV306kan (vector), pAJF792 (encoding MsTtfA) or pAJF793 (Mtb TtfA) are shown on  
751 Kanamycin agar. (Right) 10-fold dilutions of *M. smegmatis* carrying ATc inducible  
752 CRISPRi non-targeting control (NT, MGM6418) or *ttfA* (MGM6419) on agar media with  
753 and without ATc. (B) Growth curve of non-targeting (MGM6418, blue) and *ttfA* targeting  
754 (MGM6419, red) CRISPRi *M. smegmatis* strains grown in uninduced (solid, closed  
755 circles) and ATc induced (dashed, empty circles) conditions. (C) Growth curve of non-  
756 targeting (MGM6715, blue) or three distinct Mtb *ttfA* targeting CRISPRi *M. tuberculosis*  
757 strains (MGM6675, red; MGM6677, green; MGM6679, purple) grown in uninduced

758 (solid, closed circles) and ATc induced (dashed, empty circles) conditions. (D)  
759 Fluorescence microscopy of a *Ms ttfA* targeting CRISPRi strain marked with MalF(1,2)-  
760 mCitrine (MGM6433) 15 hours post CRISPRi induction with ATc (top, -TtfA) or,  
761 uninduced control at 15 hours (+TtfA, bottom). YFP (left) and DIC (right) image shown.  
762 White bar indicated in bottom of panel image is 2 micron. Exposure times for YFP  
763 250ms, 40% LED. (E) Loss of TtfA leads to short cells. Cell lengths of non-targeting  
764 (MGM6418, graph:blue, triangles) and TtfA targeting (MGM6419, red, squares)  
765 CRISPRi strains induced for 12 hours. Representative DIC /FM 4-64 images used for  
766 quantitation shown above the graph.

767 **Figure 3. TtfA is a membrane protein that localizes to poles and septa.**

768 (A) *M. smegmatis* TtfA-mCitrine expression strain (MGM6423) imaged during  
769 logarithmic growth. YFP (left), DIC (middle), and Overlay (right) image shown. White bar  
770 is 1 micron indicated in bottom of panel image. Exposure times for YFP 1s, 75% LED.  
771 (B) Localization of TtfA-msfGFP by cellular fractionation. Cell free supernatant and cell  
772 pellet fractions (left) and cytoplasmic and membrane fractions (right) probed for  
773 secreted protein Ag85 (top), membrane protein FtsY (top, middle), cytoplasmic protein  
774 RpoB (bottom, middle), and GFP for TtfA-msfGFP (bottom).

775

776 **Figure 4. TtfA and MmpL3 form a complex *in vivo* via the essential region of TtfA**  
777 **and independently of TMM synthesis.**

778 (A) DDM solubilized *M. smegmatis* lysates (left) and GFPTrap eluates (right) of  
779 msfGFP expressing control (MGM6828) and TtfA-msfGFP (MGM6815) both co-  
780 expressing MmpL3-mCherry and probed with anti-RFP (top) and anti-GFP (bottom). (B)

781 The essential region of MsTtfA is necessary and sufficient for MmpL3 interaction. DDM  
782 solubilized lysates (top) and GFPTrap eluates (bottom) of msfGFP control (MGM6828),  
783 full-length TtfA-msfGFP (1-278, MGM6829), or TtfA-msfGFP truncations (1-  
784 23:MGM6826, 1-50:MGM6823, 1-100:MGM6827, 1-150:MGM6824, 1-205:MGM6822,  
785 24-278:MGM6825) co-expressing MmpL3-mCherry and probed with anti-RFP (top) and  
786 anti-GFP (bottom). (C) The MsTtfA-MmpL3 interaction is independent of mycolate  
787 synthesis. GFPTrap eluates of MmpL3-mCherry expression strains co-expressing  
788 msfGFP control (MGM6828) or TtfA-msfGFP with either control CRISPRi for (NT,  
789 MGM6816) or *pks13* (MGM6817) depleted for 6 hours with ATc. Top panel is probed for  
790 MmpL3-mCherry with anti-RFP and bottom with anti-GFP.

791 **Figure 5. TtfA and MmpL3 co-localize at cell poles and septa independently of**  
792 **TMM synthesis.** (A) Localization of MsTtfA-mCherry/MmpL3-msfGFP (MGM6433, top)  
793 and MmpL3-mCherry/TtfA-msfGFP (MGM6434, bottom). (B) Localization of TtfA-  
794 msfGFP or MmpL3-msfGFP in Pks13 depleted or mock depleted cells.

795

796 **Figure 6. MsTtfA and MtbTtfA are required for TMM transport.**

797 (A) TLCs of extractable mycolic acids from three replicate <sup>14</sup>C-acetic acid labeled *M.*  
798 *smegmatis* cultures carrying CRISPRi targeting guide RNAs (non-targeting, MGM6418),  
799 *ttfA* (middle, MGM6419), or *mmpL3* (right, MGM6637) (B) Graph of TDM/TMM ratio for  
800 quantitation of TMM and TDM of TLCs in panel A. (C) TLCs of extractable mycolic acids  
801 from three replicate <sup>14</sup>C-acetic acid labeled *M. tuberculosis* cultures depleted for TtfA  
802 (left, MGM6675), or MmpL3 (right, MGM6676) (D) Quantitation of TDM/TMM ratio from  
803 quantitation of TMM and TDM of TLCs in panel C.\*\*\*=p<0.01.

804 **Figure 7. MSMEG\_5308-msfGFP accumulates in response to MmpL3 dysfunction**

805 (A) Lysates of MSMEG\_5308-msfGFP expression strains with CRISPRi constructs non-  
806 targeting control (NT, MGM6766), MmpL3 (MGM6718), TtfA (MGM6717), or Pks13  
807 (MGM6767) (ATc induction at 0, 2, 4, 6, 8 hours) and probed with anti-GFP or anti-  
808 RpoB. (B) Lysates of MSMEG\_5308-msfGFP expression strain (MGM6681) treated with  
809 DMSO, 10 $\mu$ g/ml INH, 20 $\mu$ g/ml INH, 5 $\mu$ M SQ109, 5 $\mu$ M BM212, 5 $\mu$ M AU1235 for 0, 1.5,  
810 or 3 hours and probed with anti-GFP and anti-RpoB (loading control)

811

812 **Figure 8. MSMEG\_5308 localizes to cell poles and septa and stabilizes the**  
813 **TtfA/MmpL3 interaction.**

814 (A) MSMEG\_5308-msfGFP expression strain (MGM6681) imaged during logarithmic  
815 growth. GFP, DIC and merged images are shown. (B) GFPTrap pulldown of TtfA-  
816 msfGFP /MmpL3-mCherry co-expression strains with non-targeting or MSMEG\_5308  
817 targeting CRISPRi constructs. Left panel is the input and right panel is the eluate from  
818 the GFPTrap column, either in the presence of DDM or Triton X-100.

819

820

821

822

A.

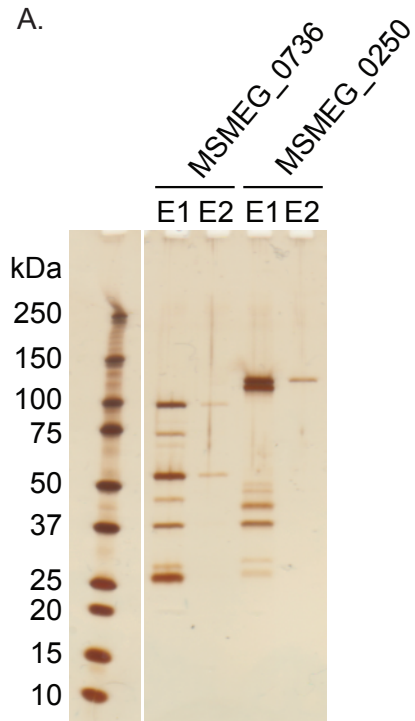

B.

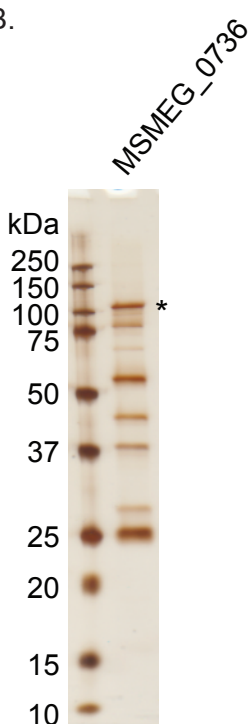

Figure 1



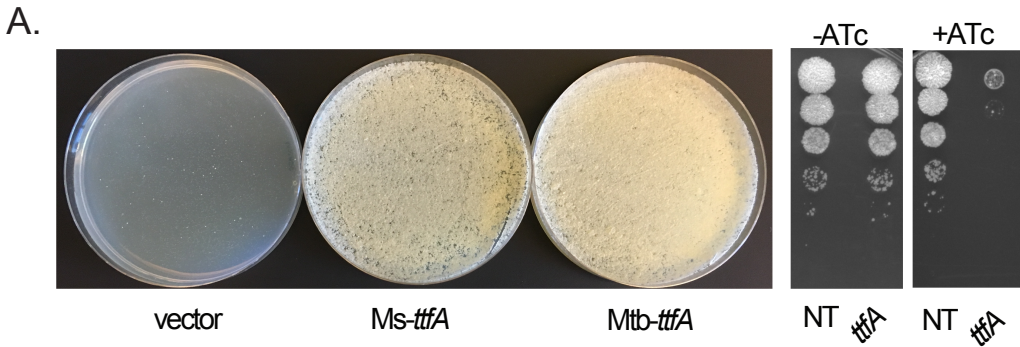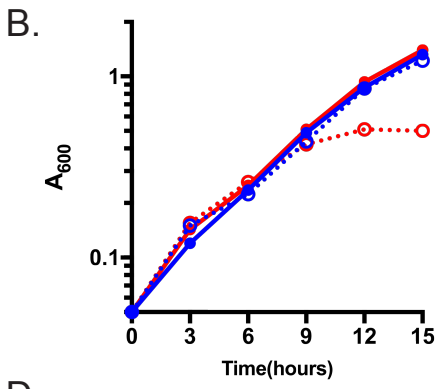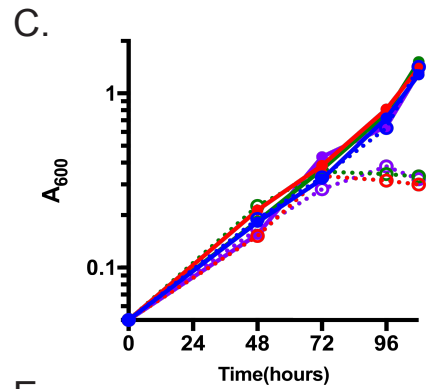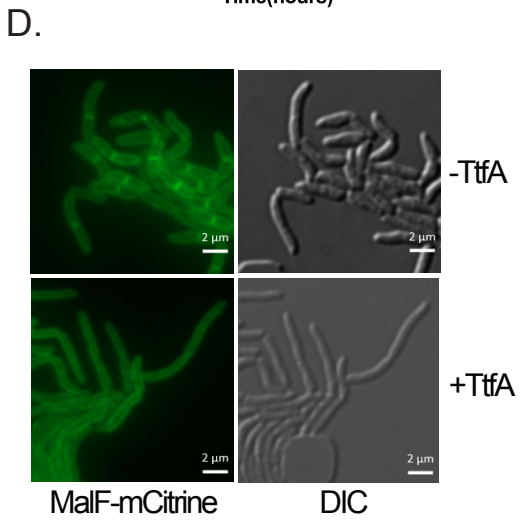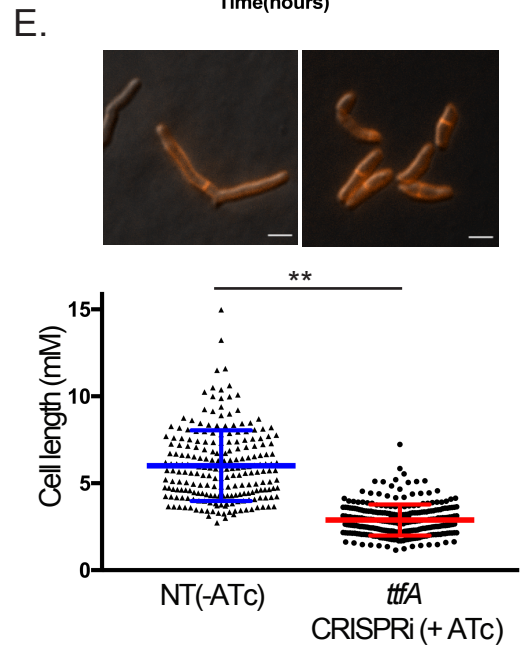

Figure 2

A.

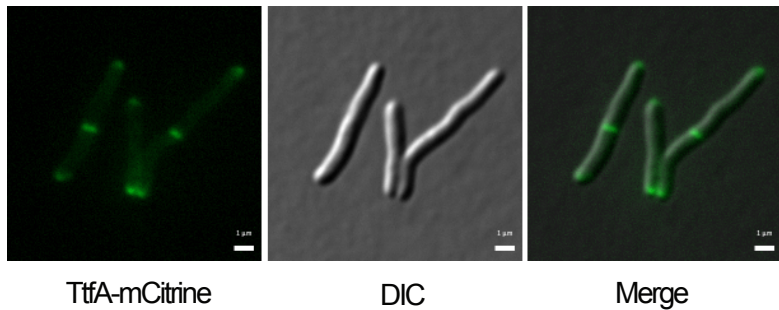

B.

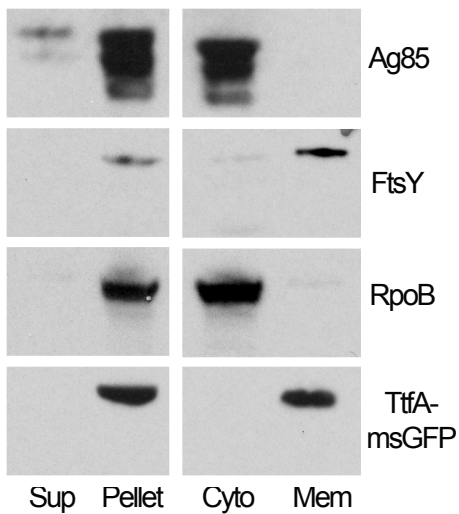

Figure 3

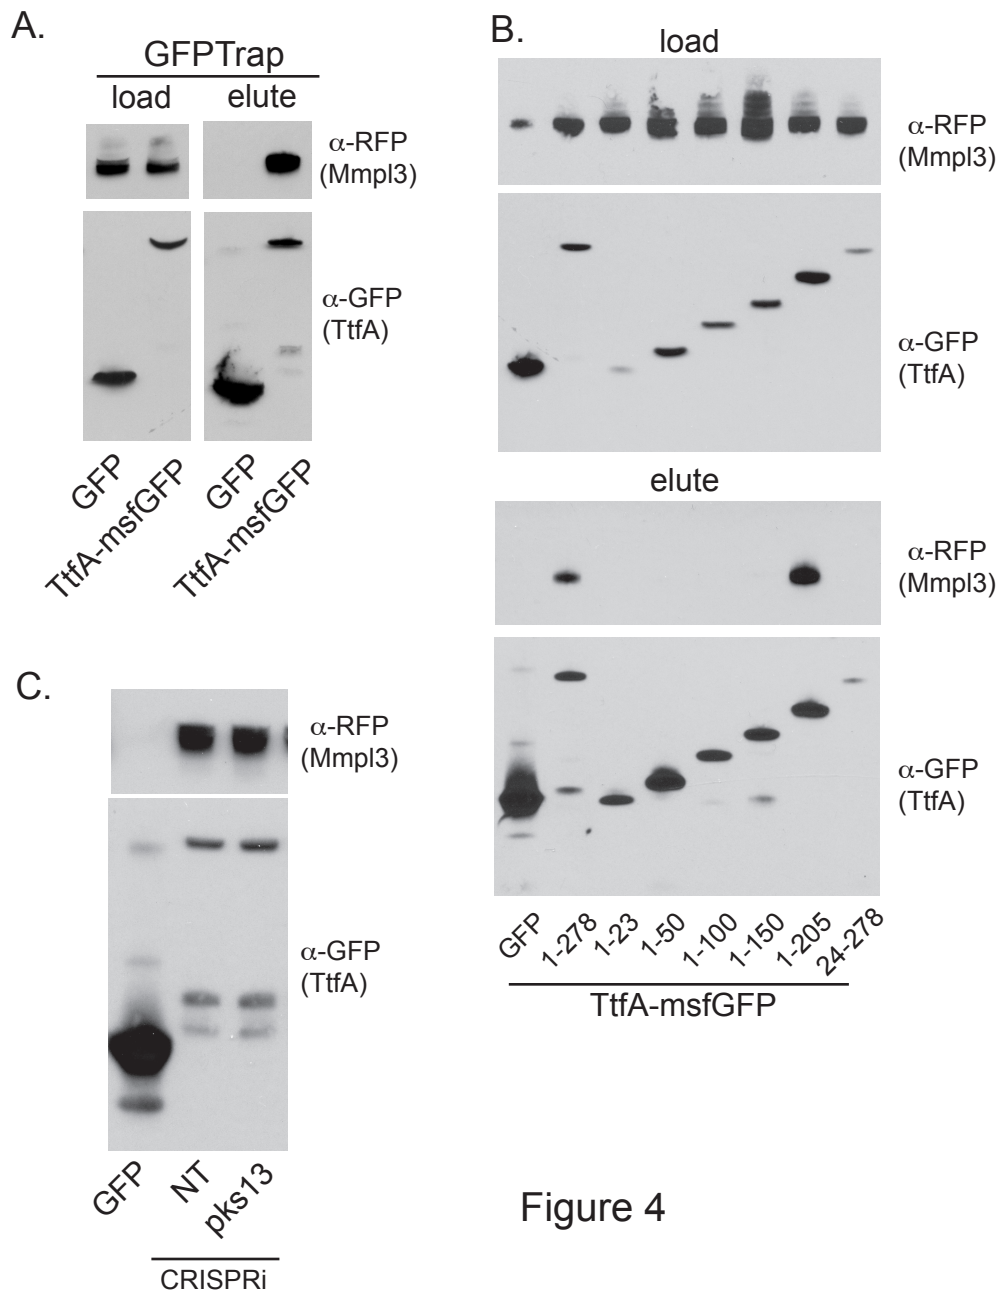

Figure 4

A.

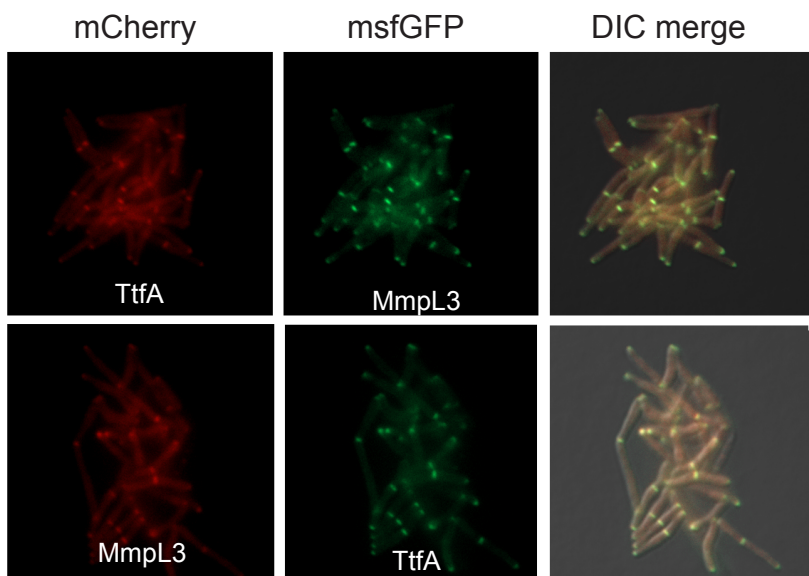

B.

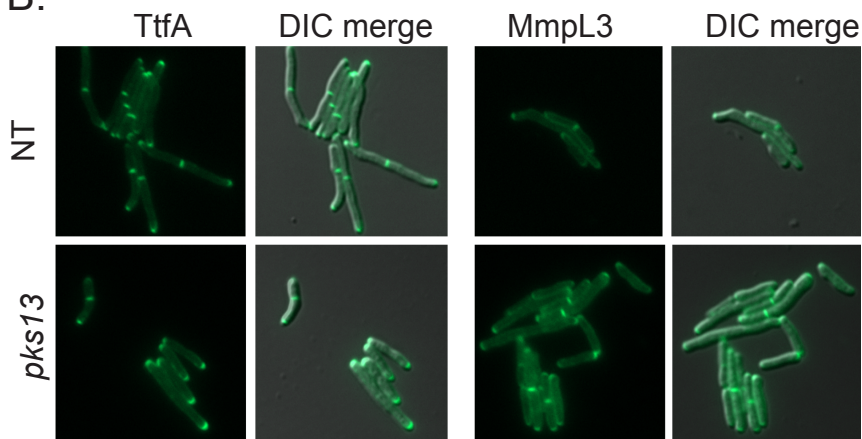

Figure 5

A.

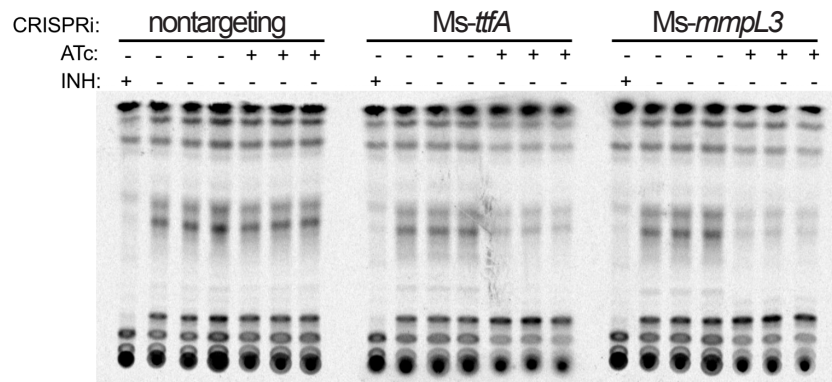

B.

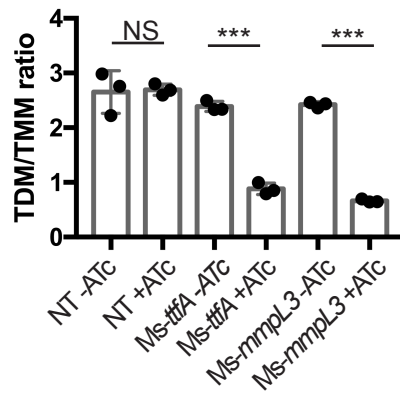

C.

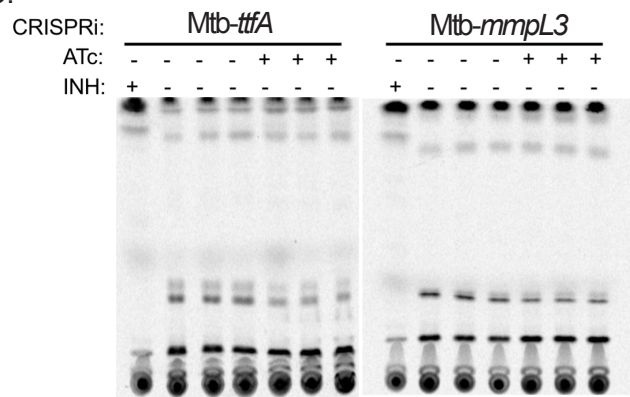

D.

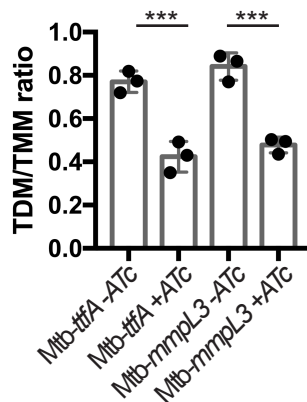

Figure 6

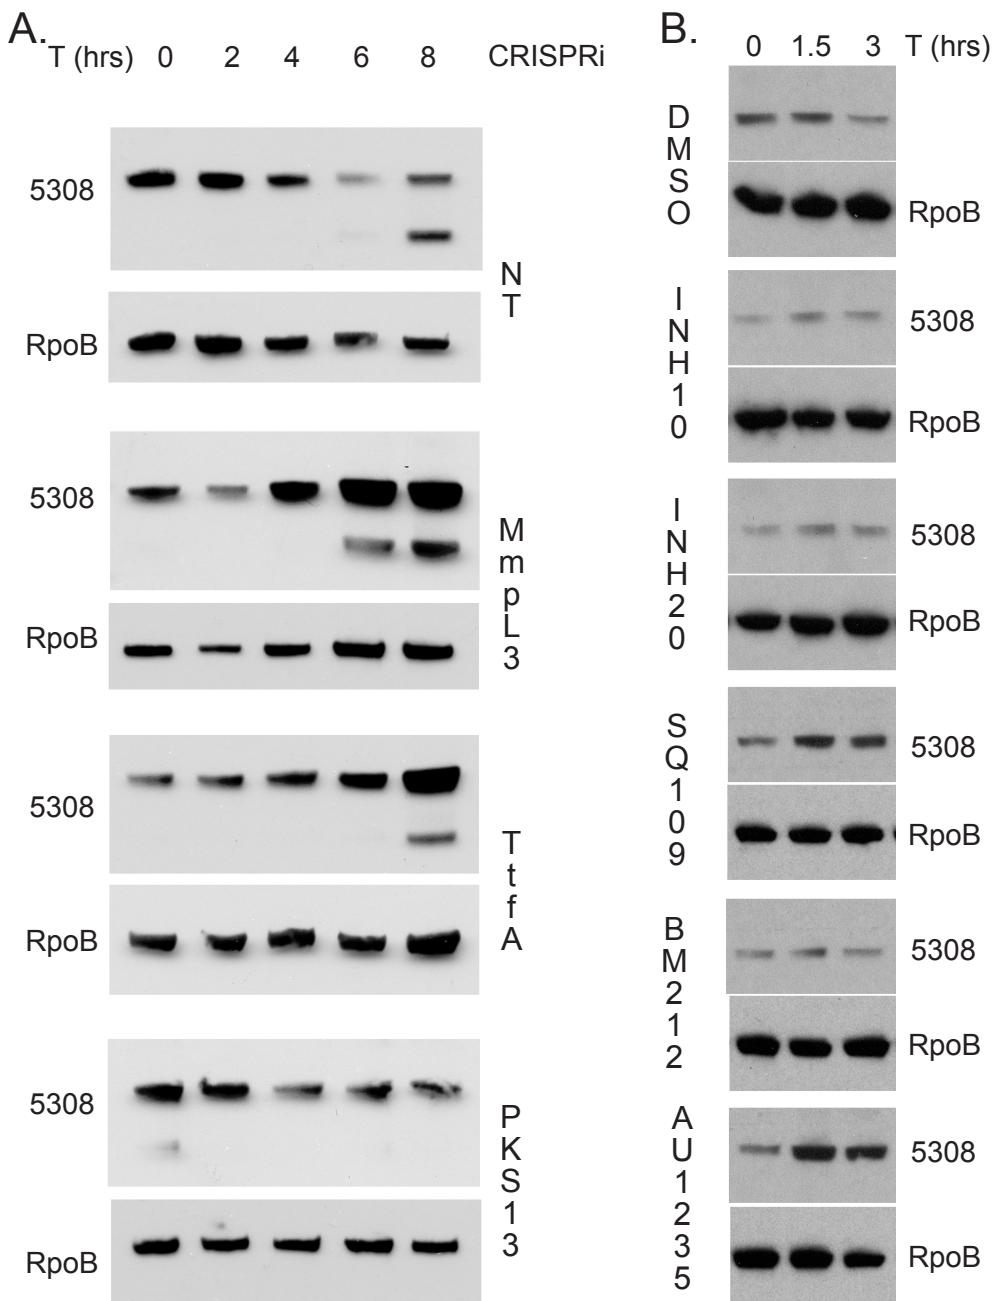

Figure 7

A.

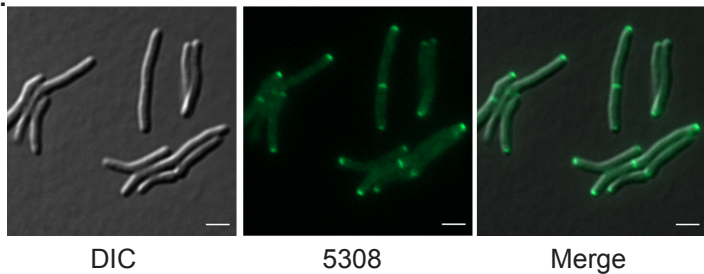

B.

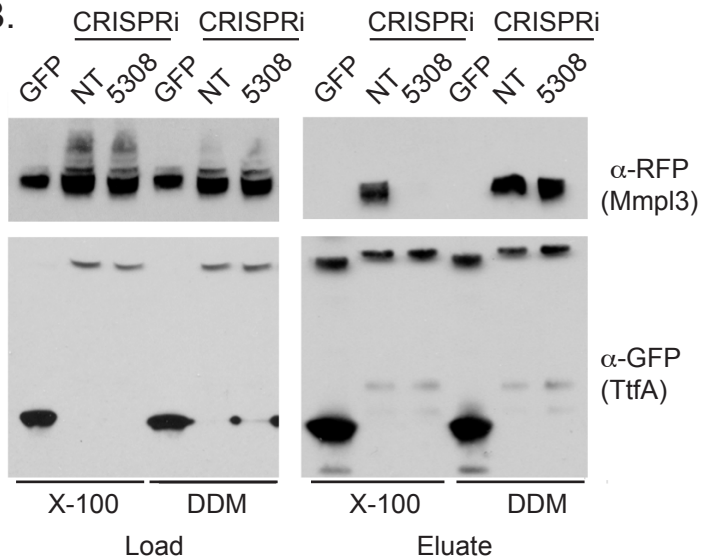

Figure 8
